# Supplementary material
Source: publisher figshare collection journal article supplement (https://acs.figshare.com/ndownloader/files/9592861)
Supplement: Supplementary file 1 [file 9592861]

# **Supporting Information**

## **Energy Efficiency and Performance Limiting Effects in Thermo-Osmotic Energy Conversion from Low-Grade Heat**

Anthony P. Straub and Menachem Elimelech\*

*Department of Chemical and Environmental Engineering, Yale University, New Haven, Connecticut 06520-8286, United States*

### **Contents:**

**3 Pages**

**1 Supporting Figure**

\* Corresponding author; Address: P.O. Box 208286, Yale University, New Haven, CT 06520; Phone: +1 (203) 432-2789; Fax: +1 (203) 432-2881; email: [menachem.elimelech@yale.edu](mailto:menachem.elimelech@yale.edu)

## SUPPORTING DISCUSSION

**Vapor Transport in a Deaerated System.** Membranes operating under vacuum will demonstrate unique transport behavior. Because the mean free path increases substantially with a lower air pressure in the pores, even membranes with pore sizes as large as 500 nm will operate in the Knudsen transport regime.<sup>1–3</sup> Models for transport through vapor-gap membranes under vacuum also include a small contribution from viscous transport through the pore. The permeability of a membrane operating in Poiseuille or viscous flow is expressed as<sup>2</sup>

$$B_w^V = \frac{r^2 P_m \varepsilon}{8 \eta_w R T \tau \delta} \quad (\text{S1})$$

where  $r$  is the membrane pore radius,  $P_m$  is the average pressure in the membrane pore,  $\varepsilon$  is the membrane porosity,  $\eta_w$  is the viscosity of water vapor,  $R$  is the ideal gas constant,  $T$  is the temperature,  $\tau$  is the tortuosity, and  $\delta$  is the thickness.

The permeability of the membrane under vacuum is calculated as the sum of the Knudsen permeability (eq 7 of the main text) and the permeability of the membrane under viscous flow (eq S1). In most cases, the viscous contribution is relatively low. For example, in a 100  $\mu\text{m}$  thick membrane with a 400 nm pore size, the Knudsen permeability is  $5.60 \times 10^{-6} \text{ kg m}^{-2}\text{s}^{-1}\text{Pa}^{-1}$ , whereas the viscous permeability is  $0.47 \times 10^{-6} \text{ kg m}^{-2}\text{s}^{-1}\text{Pa}^{-1}$ .

## REFERENCES

- (1) Schofield, R. W.; Fane, A. G.; Fell, C. J. D. Gas and Vapour Transport through Microporous Membranes. II. Membrane Distillation. *J. Memb. Sci.* **1990**, *53*, 173–185.
- (2) Khayet, M. Membranes and Theoretical Modeling of Membrane Distillation: A Review. *Adv. Colloid Interface Sci.* **2011**, *164*, 56–88.
- (3) Winter, D.; Koschikowski, J.; Ripperger, S. Desalination Using Membrane Distillation: Flux Enhancement by Feed Water Deaeration on Spiral-Wound Modules. *J. Memb. Sci.* **2012**, *423–424*, 215–224.

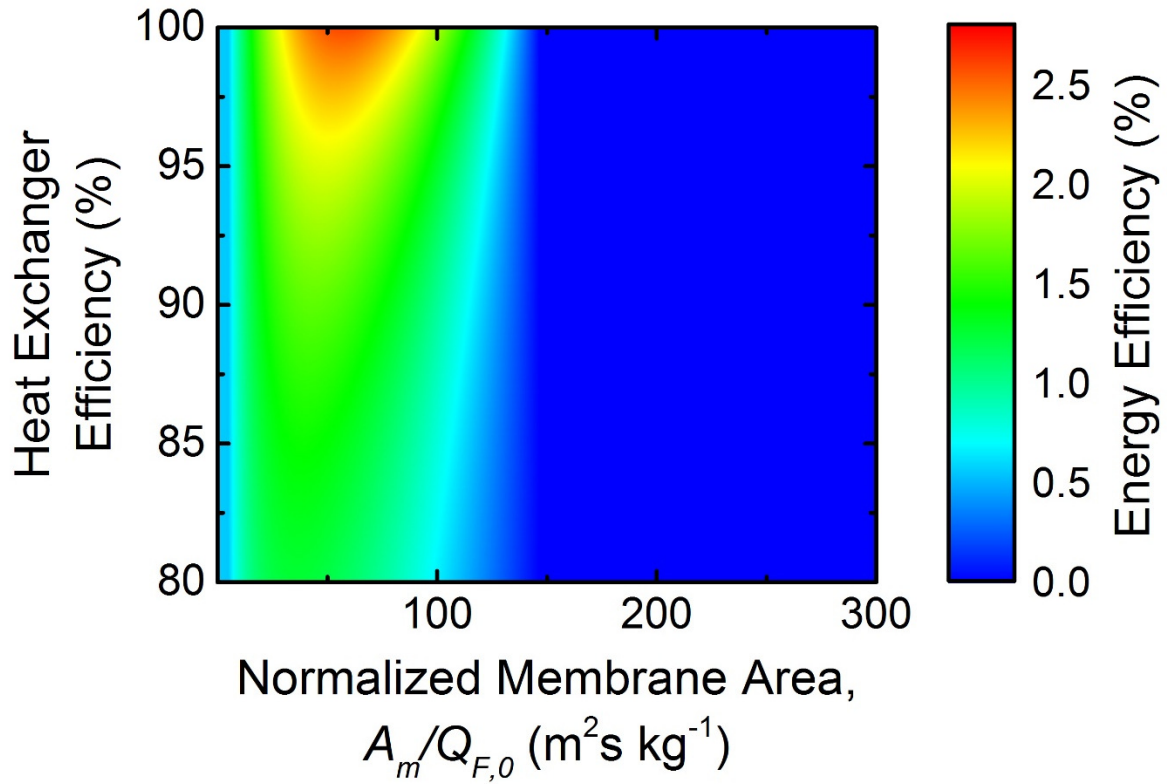

**Figure S1.** Energy conversion efficiency as a function of the heat exchanger efficiency and normalized membrane area (membrane area,  $A_m$ , divided by the initial feed flow rate,  $Q_{F,0}$ ). The heat source temperature is 60 °C and the heat sink temperature is 20 °C. The hydraulic pressure difference between the two streams is 20000 kPa (200 bar), and balanced flow rates are assumed. The membrane permeability coefficient,  $B_w$ , is  $1 \times 10^{-6}$  kg m<sup>-2</sup>s<sup>-1</sup>Pa<sup>-1</sup>; the thermal conductivity of the membrane,  $K_m$ , is 0.04 W m<sup>-1</sup>K<sup>-1</sup>; the heat transfer coefficient,  $h$ , on both sides of the membrane is 5000 W m<sup>-2</sup>K<sup>-1</sup>; and the thickness is 100 μm.
